# Supplementary material for: Photochemistry of P,N-bidentate rhenium(i) tricarbonyl complexes: reactive species generation and potential application for antibacterial photodynamic therapy
Source: Royal Society of Chemistry journal article supplement (doi:10.1039/d1ra06416a), 2021-01-01
Supplement: d1ra06416a1.pdf [file d1ra06416a1.pdf]

Electronic Supplementary Information for

**Photochemistry of *P,N*-Bidentate Rhenium(I) Tricarbonyl Complexes:  
Reactive Species Generation and Potential Application for Antibacterial  
Photodynamic Therapy**

Alison Acosta, Javier Antipán, Mariano Fernández, Gaspar Prado, Catalina Sandoval-  
Altamirano, German Günther, Izabook Gutiérrez-Urrutia, Ignacio Poblete-Castro, Andres Vega  
and Nancy Pizarro

## Summary of contents

**Figure S1.** Spectral changes of **RePNBr** in EtOH (a), DCM (b) and MeCN (c) upon irradiation at 365 nm at 20°C.

**Figure S2.** Spectral changes of **RePNNBr** in EtOH (a), DCM (b) and MeCN (c) upon irradiation at 365 nm at 20°C.

**Figure S3.** Spectral changes of **RePNTfO** in EtOH (a), DCM (b) and MeCN (c) upon irradiation at 365 nm at 20°C.

**Figure S4.** IR (CO-stretching region) spectral change of **RePNBr** (left), **RePNNBr** (center) and **RePNTfO** (right), in DCM with 0 min (blue) and 15 min (red) of irradiation (365 nm) at room temperature.

**Figure S5.** TD-DFT computed spectra for *fac*-**RePNBr** and its *mer*-isomers.

**Figure S6.** DFT computed Vibrational Circular Dichroism spectra for *fac*-**RePNBr** and its *mer*-isomers.

**Derivation of Equation 1.**

**Figure S1.** Spectral changes of **RePNBr** in EtOH (a), DCM (b) and MeCN (c) upon irradiation at 365 nm at 20°C.

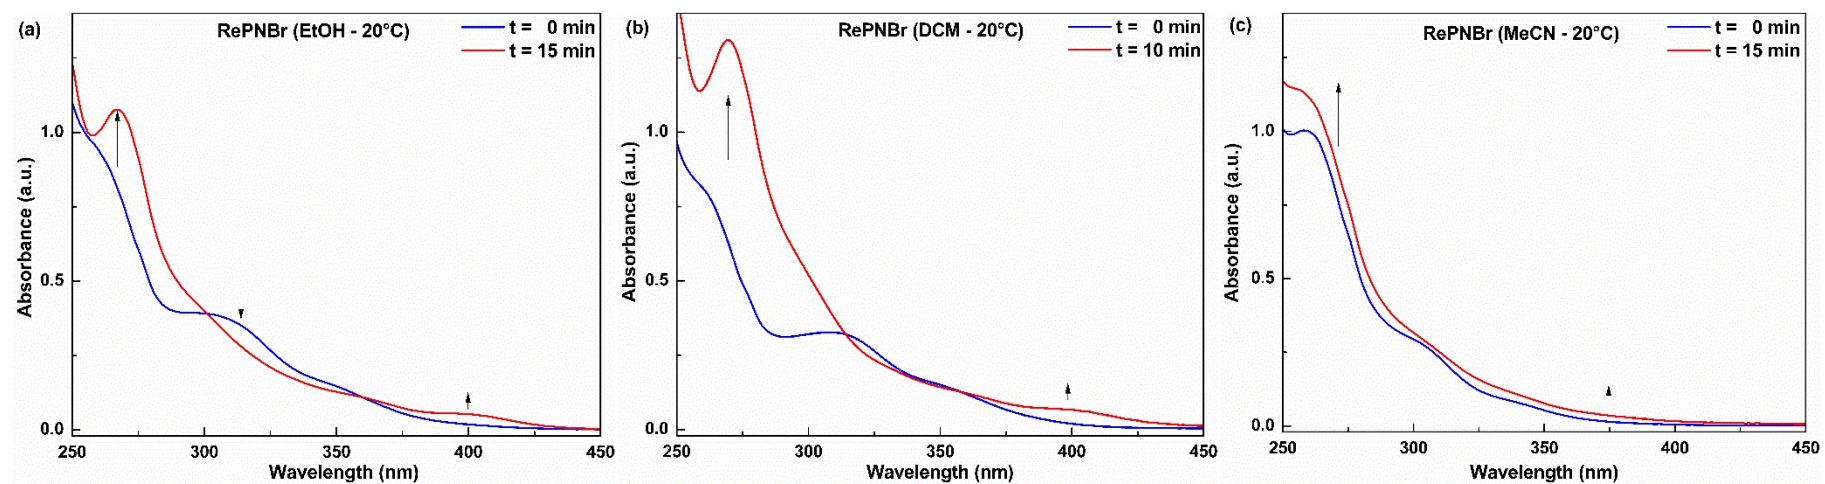

**Figure S2.** Spectral changes of **RePNNBr** in EtOH (a), DCM (b) and MeCN (c) upon irradiation at 365 nm at 20°C.

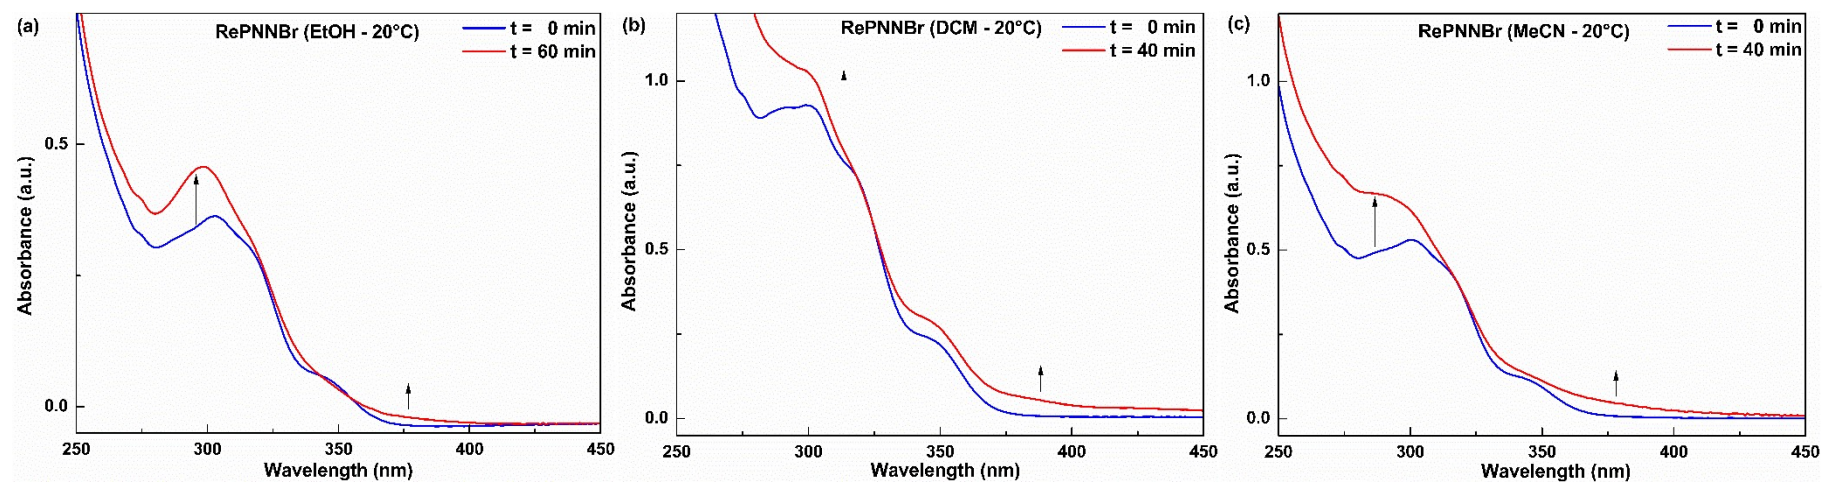

**Figure S3.** Spectral changes of **RePNTfO** in EtOH (a), DCM (b) and MeCN (c) upon irradiation at 365 nm at 20°C.

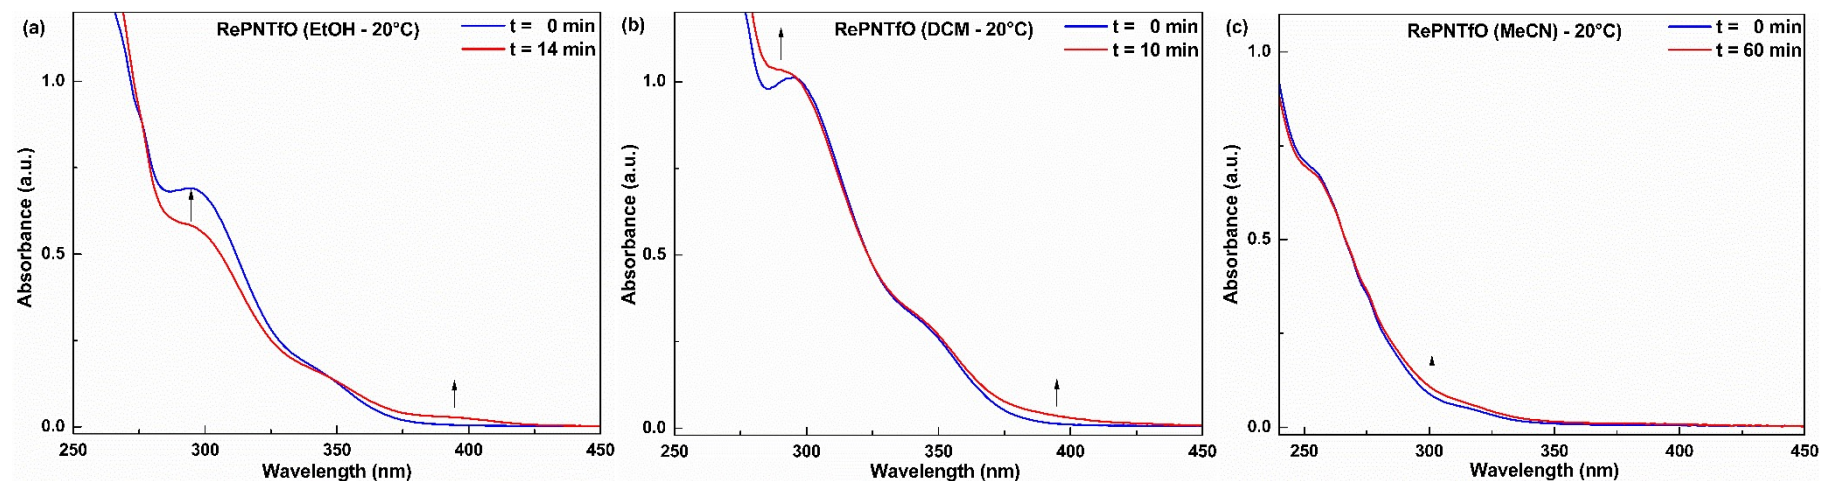

**Figure S4.** IR (CO-stretching region) spectral change of **RePNBr** (left), **RePNNBr** (center) and **RePNTfO** (right), in DCM with 0 min (blue) and 15 min (red) of irradiation (365 nm) at room temperature.

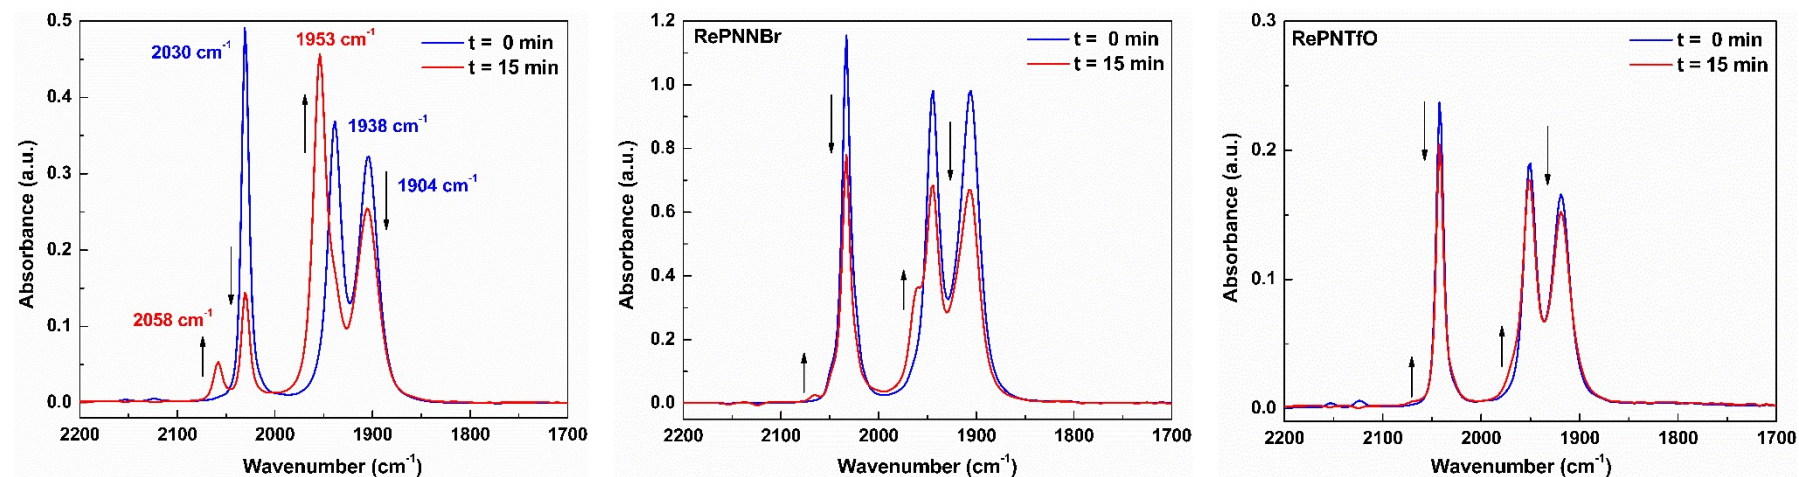

**Figure S5.** TD-DFT computed spectra for *fac*-RePNBr and its *mer*-isomers.

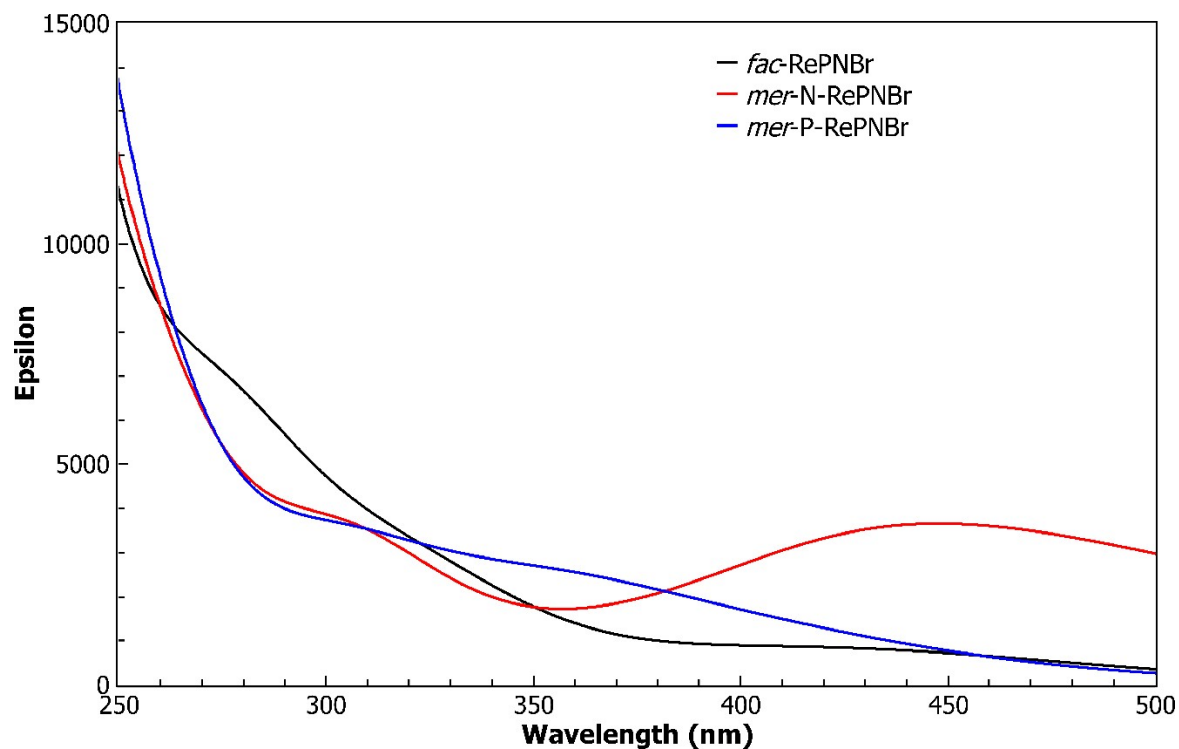

**Figure S6.** DFT computed Vibrational Circular Dichroism spectra for *fac*-RePNBr and its *mer*-isomers.

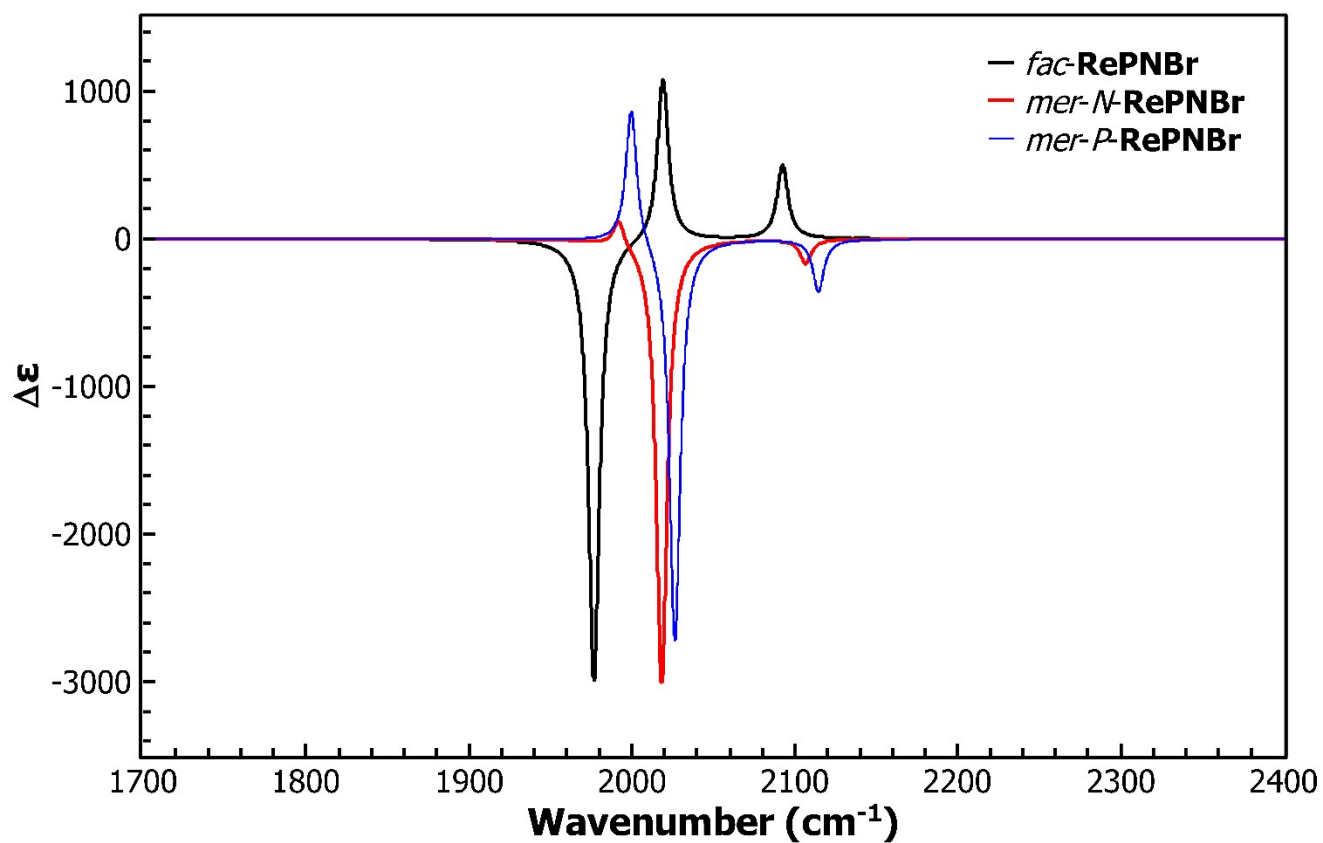

Derivation of Equation 1.

Our approximation resembles the Hippler's proposal,<sup>1</sup> where the absorbed photons can be considered as a second reactant, being the first elementary process a bimolecular reaction. Consider the following elementary processes in the mechanism:

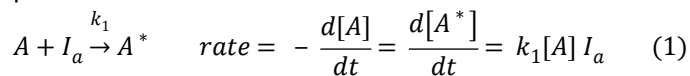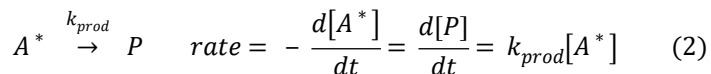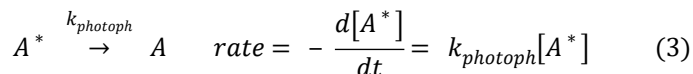

and applying SS approximation for excited state concentration,  $[A^*]$

$$k_1[A] I_a = (k_{prod} + k_{photoph}) [A^*] \quad (4)$$

$$[A^*] = \frac{k_1 I_a}{(k_{prod} + k_{photoph})} [A] \quad (5)$$

Replacing in eq. 2

$$\frac{d[P]}{dt} = k_{prod} \frac{k_1 I_a}{(k_{prod} + k_{photoph})} [A] \quad (6)$$

Under well controlled steady state experimental conditions: irradiation with constant light intensity, geometry unaltered, similar extinction coefficients, the value of  $I_a$  is constant, and then, the eq. 6 can be reduced to:

$$\frac{d[P]}{dt} = k_{app} [A] \quad (7)$$

$$\text{where } k_{app} = k_{prod} \frac{k_1 I_a}{(k_{prod} + k_{photoph})}$$

under above mentioned considerations and conditions, an apparent first order expression can be defined as follows:

$$[P] = [A]_0 (1 - e^{-k_{app} t}) \quad (8)$$

where  $[P]$  is the photoproduct concentration and  $[A]_0$  is the initial concentration of the complex. As the  $[P]$  can be replaced by  $A_p / (\varepsilon_p l)$ , where  $A_p$  and  $\varepsilon_p$  correspond to the absorbance and molar extinction coefficient of the product, respectively, and  $l$  is the optical path, equation 8 can be expressed as:

$$A_p = \varepsilon_p l [A]_0 (1 - e^{-k_{app} t}) \quad (9)$$

1. M. Hippler, *Journal of Chemical Education*, 2003, **80**, 1074.
